# Supplementary material for: Robust Selection Algorithm (RSA) for Multi-Omic Biomarker Discovery; Integration with Functional Network Analysis to Identify miRNA Regulated Pathways in Multiple Cancers
Source: PubMed Central journal article supplement (PMC4623517; doi:10.1371/journal.pone.0140072), 2015-10-27
Supplement: pone.0140072.s001.pdf [file pone.0140072.s001.pdf]

| <b>Cancer Type</b>   | <b>Number of Matched Samples</b> |
|----------------------|----------------------------------|
| Ovarian (OVCA)       | 474                              |
| Lung (LUAD)          | 429                              |
| Kidney (KIRC)        | 451                              |
| Head and Neck (HNSC) | 354                              |
| Breast (BRCA)        | 792                              |
