# Supplementary material for: Robust Selection Algorithm (RSA) for Multi-Omic Biomarker Discovery; Integration with Functional Network Analysis to Identify miRNA Regulated Pathways in Multiple Cancers
Source: PubMed Central journal article supplement (PMC4623517; doi:10.1371/journal.pone.0140072), 2015-10-27
Supplement: pone.0140072.s007.pdf [file pone.0140072.s007.pdf]

miR15b

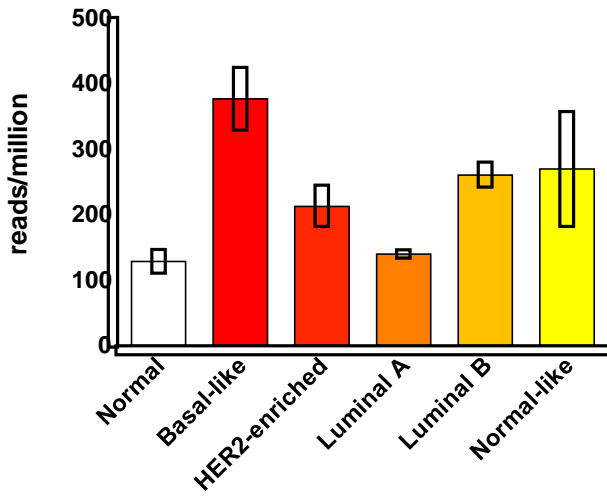

miR24-1\*

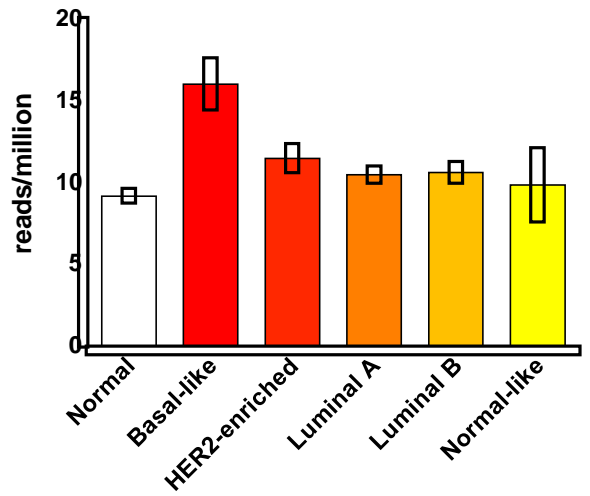

miR30e

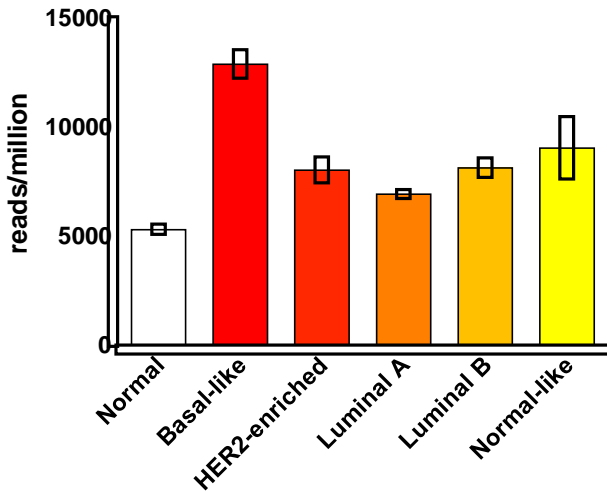

| mir               | Basal | LumA | LumB | Her2 |
|-------------------|-------|------|------|------|
| hsa-mir-15b       | PS    | PS   | GS   |      |
| hsa-mir-24-1-star | GS    | PS   | PS   |      |
| hsa-mir-30e       | PS    | PS   | PS   | PS   |
