# Supplementary material for: Robust Selection Algorithm (RSA) for Multi-Omic Biomarker Discovery; Integration with Functional Network Analysis to Identify miRNA Regulated Pathways in Multiple Cancers
Source: PubMed Central journal article supplement (PMC4623517; doi:10.1371/journal.pone.0140072), 2015-10-27
Supplement: pone.0140072.s008.pdf [file pone.0140072.s008.pdf]

## List of genes associated to extracellular matrix

|         |          |         |          |        |          |
|---------|----------|---------|----------|--------|----------|
| A2M     | CIITA    | COL6A2  | FCN1     | MBL2   | PLOD3    |
| ABI3BP  | COL10A1  | COL6A3  | FCN2     | MFAP4  | PRELP    |
| ACHE    | COL11A1  | COL6A6  | FCN3     | MMP1   | PRSS2    |
| ADAM15  | COL11A2  | COL7A1  | FHOD1    | MMP10  | PRTN3    |
| ADAM9   | COL12A1  | COL8A1  | FMOD     | MMP11  | PTGES    |
| ADAMTS2 | COL13A1  | COL8A2  | FN1      | MMP13  | RELL2    |
| ADIPOQ  | COL14A1  | COL9A1  | GP6      | MMP16  | RPSA     |
| ADORA2B | COL16A1  | COL9A2  | HDAC2    | MMP19  | SERPINH1 |
| AMELX   | COL17A1  | COL9A3  | HSD17B12 | MMP2   | SFRP2    |
| AMN     | COL18A1  | COLEC12 | IBSP     | MMP26  | SFTPA1   |
| ANTXR1  | COL1A1   | COLQ    | ID1      | MMP3   | SFTPA2   |
| ANTXR2  | COL1A2   | COMP    | KLK6     | MMP7   | SFTPD    |
| ANXA2   | COL20A1  | CST3    | LACRT    | MMP8   | SOD3     |
| ARG1    | COL23A1  | CTGF    | LAMA4    | MMP9   | SPARC    |
| ATP7A   | COL24A1  | CTSL1   | LAMB1    | MRC2   | SRGN     |
| BGN     | COL25A1  | DCN     | LAMB2    | MSR1   | THBS1    |
| BMP4    | COL29A1  | DDR1    | LAMC1    | NF1    | TLL1     |
| C1QA    | COL2A1   | DDR2    | LAMC2    | NID2   | TNXB     |
| C1QB    | COL3A1   | DPP4    | LAMC3    | NOMO1  | TRAM2    |
| C1QC    | COL4A1   | DPT     | LEPRE1   | NOMO3  | UCN      |
| C1QL3   | COL4A2   | ECM2    | LEPREL1  | OPTC   | USH2A    |
| C1QTNF1 | COL4A3   | EDA     | LEPREL2  | P4HA1  | VWF      |
| C1QTNF5 | COL4A3BP | ELANE   | LMX1B    | P4HA2  | WDR33    |
| C6orf15 | COL4A4   | EMID1   | LOX      | P4HA3  | WNT4     |
| CBLN1   | COL4A5   | EMID2   | LOXL1    | P4HB   | XPNPEP2  |
| CBLN3   | COL4A6   | EMILIN1 | LOXL2    | PCOLCE | ZBTB7B   |
| CBLN4   | COL5A1   | EMILIN2 | LOXL3    | PEPD   |          |
| CD36    | COL5A2   | EP300   | LOXL4    | PITX2  |          |
| CD44    | COL5A3   | F2      | LUM      | PLOD1  |          |
| CEBPB   | COL6A1   | F2R     | MARCO    | PLOD2  |          |
