# Supplementary material for: Robust Selection Algorithm (RSA) for Multi-Omic Biomarker Discovery; Integration with Functional Network Analysis to Identify miRNA Regulated Pathways in Multiple Cancers
Source: PubMed Central journal article supplement (PMC4623517; doi:10.1371/journal.pone.0140072), 2015-10-27

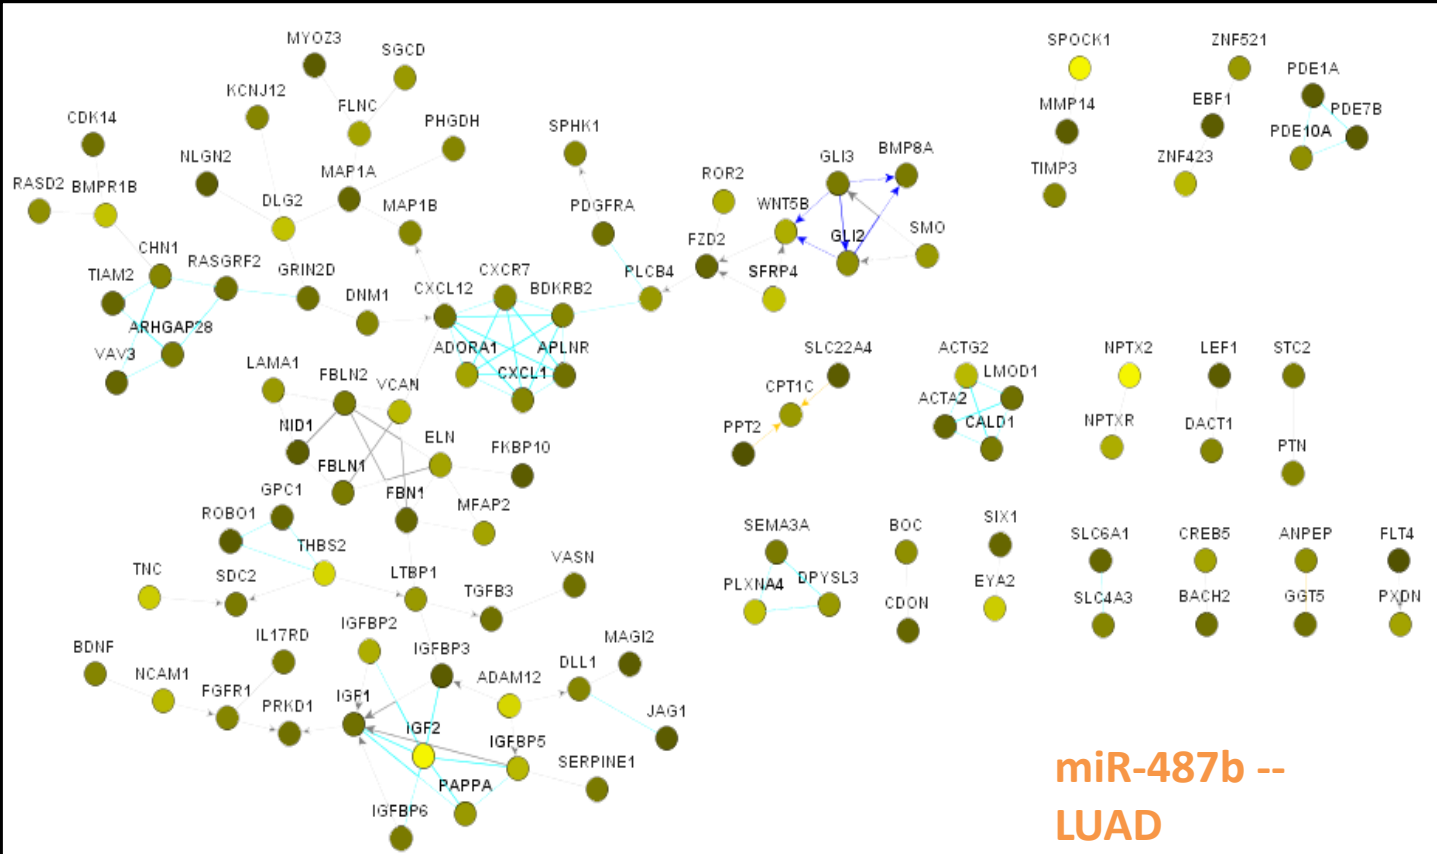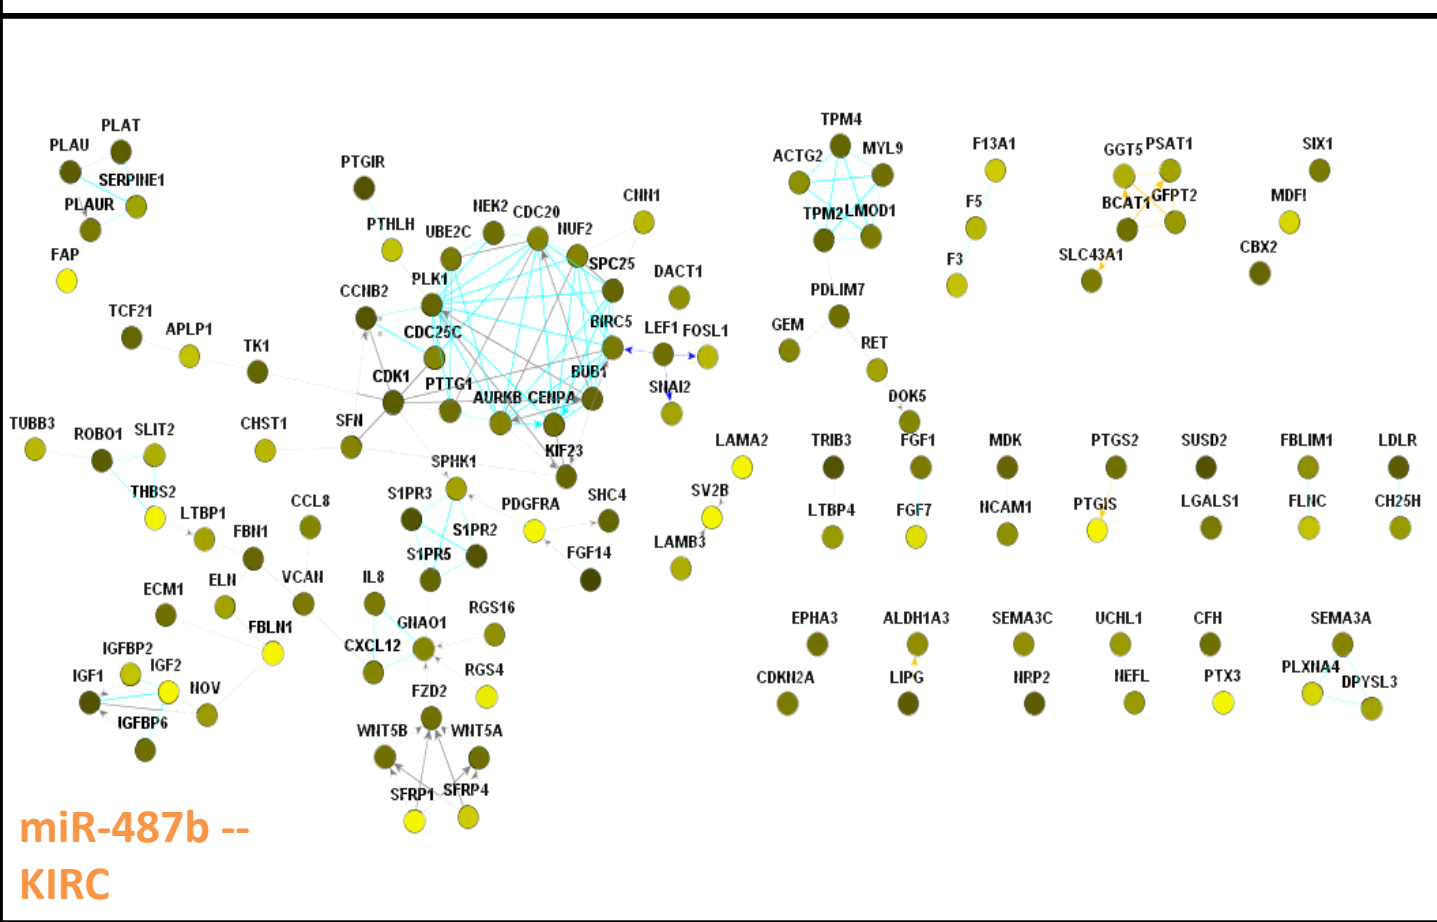

Supplement: pone.0140072.s011.pdf [file pone.0140072.s011.pdf]
