# Supplementary material for: Robust Selection Algorithm (RSA) for Multi-Omic Biomarker Discovery; Integration with Functional Network Analysis to Identify miRNA Regulated Pathways in Multiple Cancers
Source: PubMed Central journal article supplement (PMC4623517; doi:10.1371/journal.pone.0140072), 2015-10-27
Supplement: pone.0140072.s032.pdf [file pone.0140072.s032.pdf]

| Cancer Type   | Platform | Date Last Modified |
|---------------|----------|--------------------|
| Breast        | GA       | April, 2013        |
|               | HiSeq    | July, 2013         |
|               | Clinical | September, 2013    |
| Ovarian       | GA       | NA                 |
|               | HiSeq    | April, 2013        |
|               | Clinical | September, 2013    |
| Kidney        | GA       | April, 2013        |
|               | HiSeq    | April, 2013        |
|               | Clinical | September, 2013    |
| Lung          | GA       | April, 2013        |
|               | HiSeq    | July, 2013         |
|               | Clinical | September, 2013    |
| Head and Neck | GA       | August, 2013       |
|               | HiSeq    | April, 2013        |
|               | Clinical | September, 2013    |
